# Supplementary material for: Autofluorescence of MDA-modified proteins as an in vitro and in vivo probe in oxidative stress analysis
Source: PubMed Central journal article supplement (PMC4026423; doi:10.1007/s13238-014-0052-1), 2014-04-03
Supplement: 13238_2014_52_MOESM2_ESM.pdf [file 13238_2014_52_MOESM2_ESM.pdf]

Fig. S1 Qiang et. al

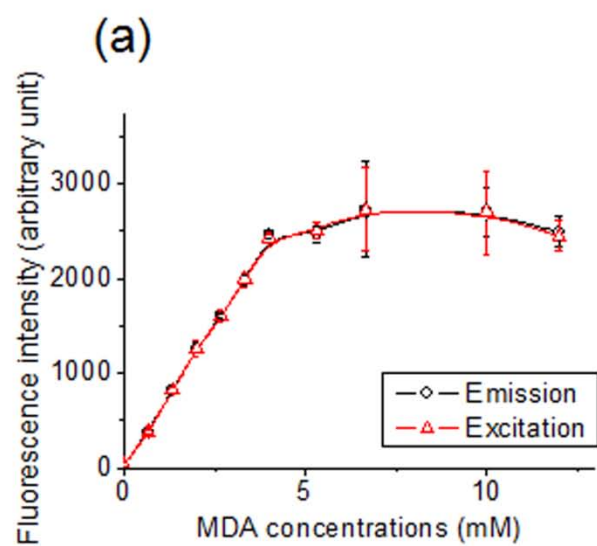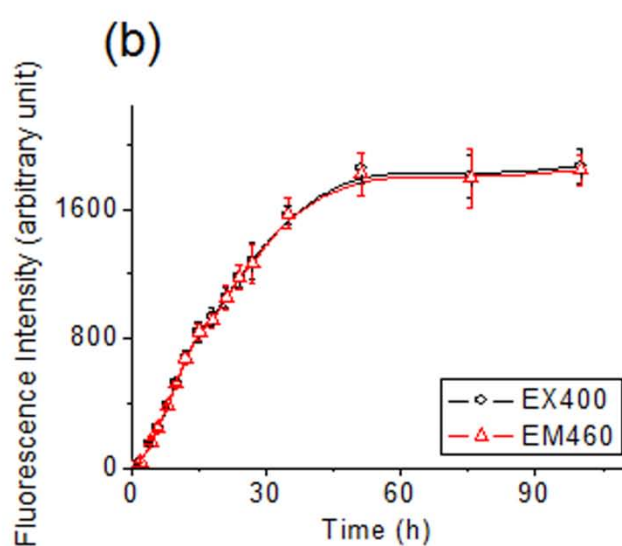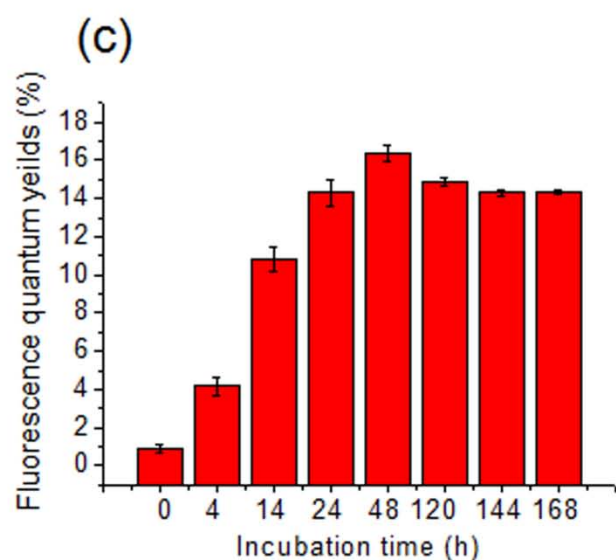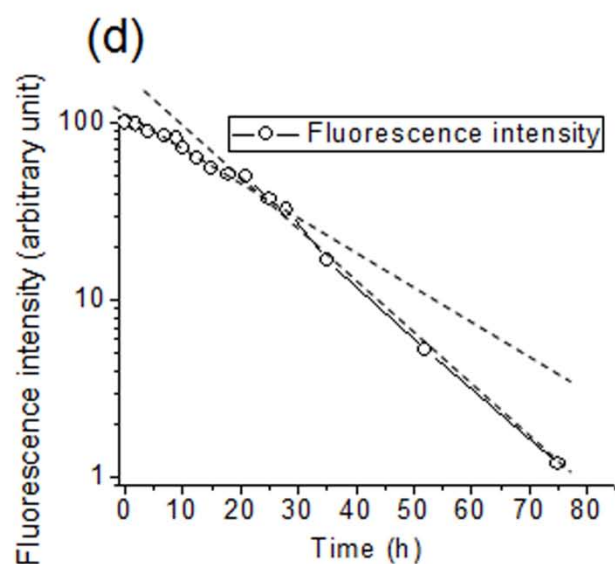

Fig. S2. Qiang et al.

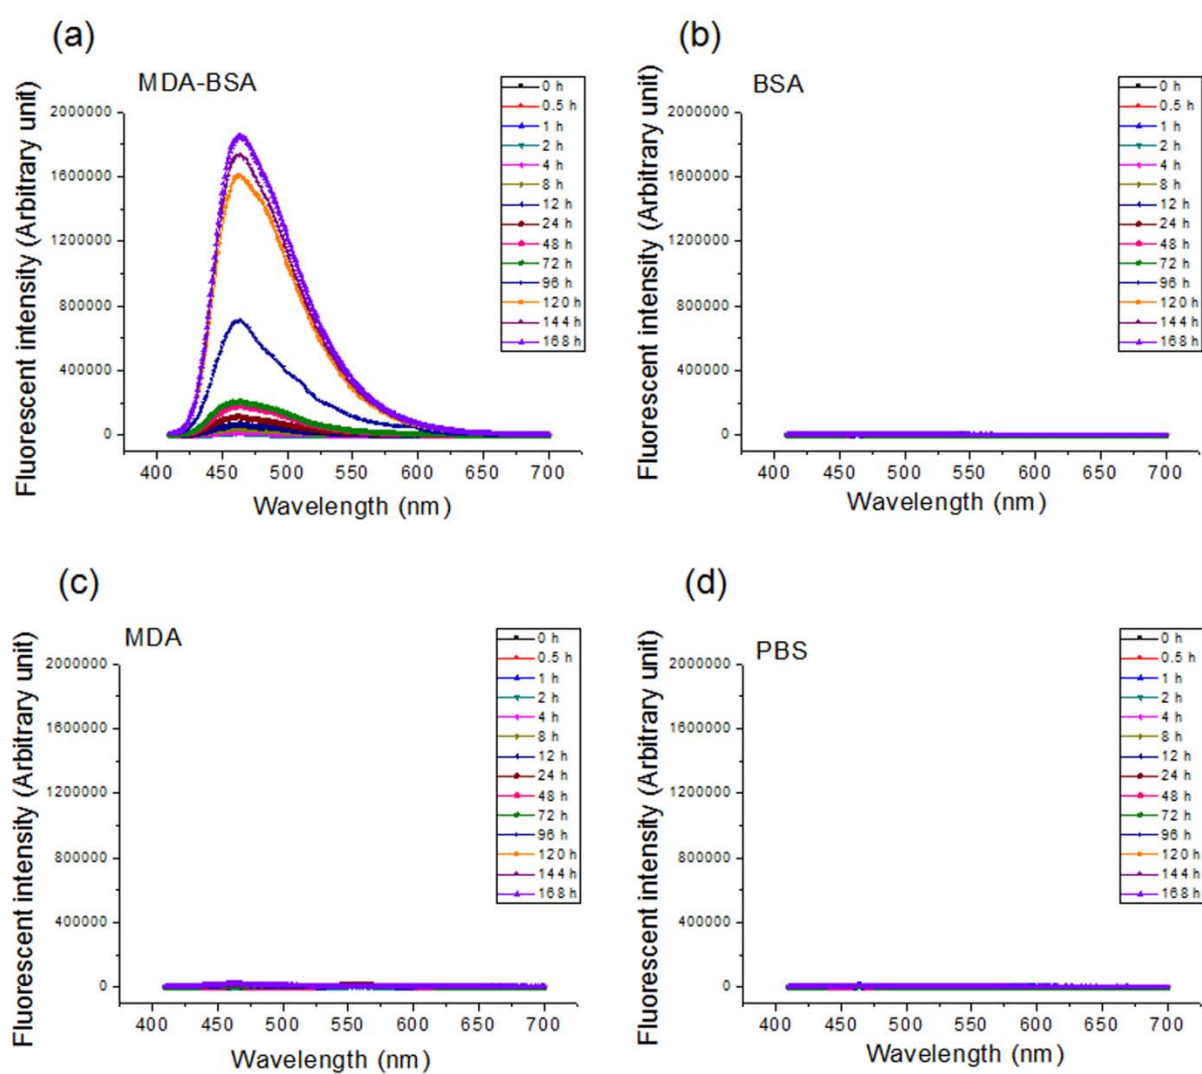

Fig. S3 Qiang et. al

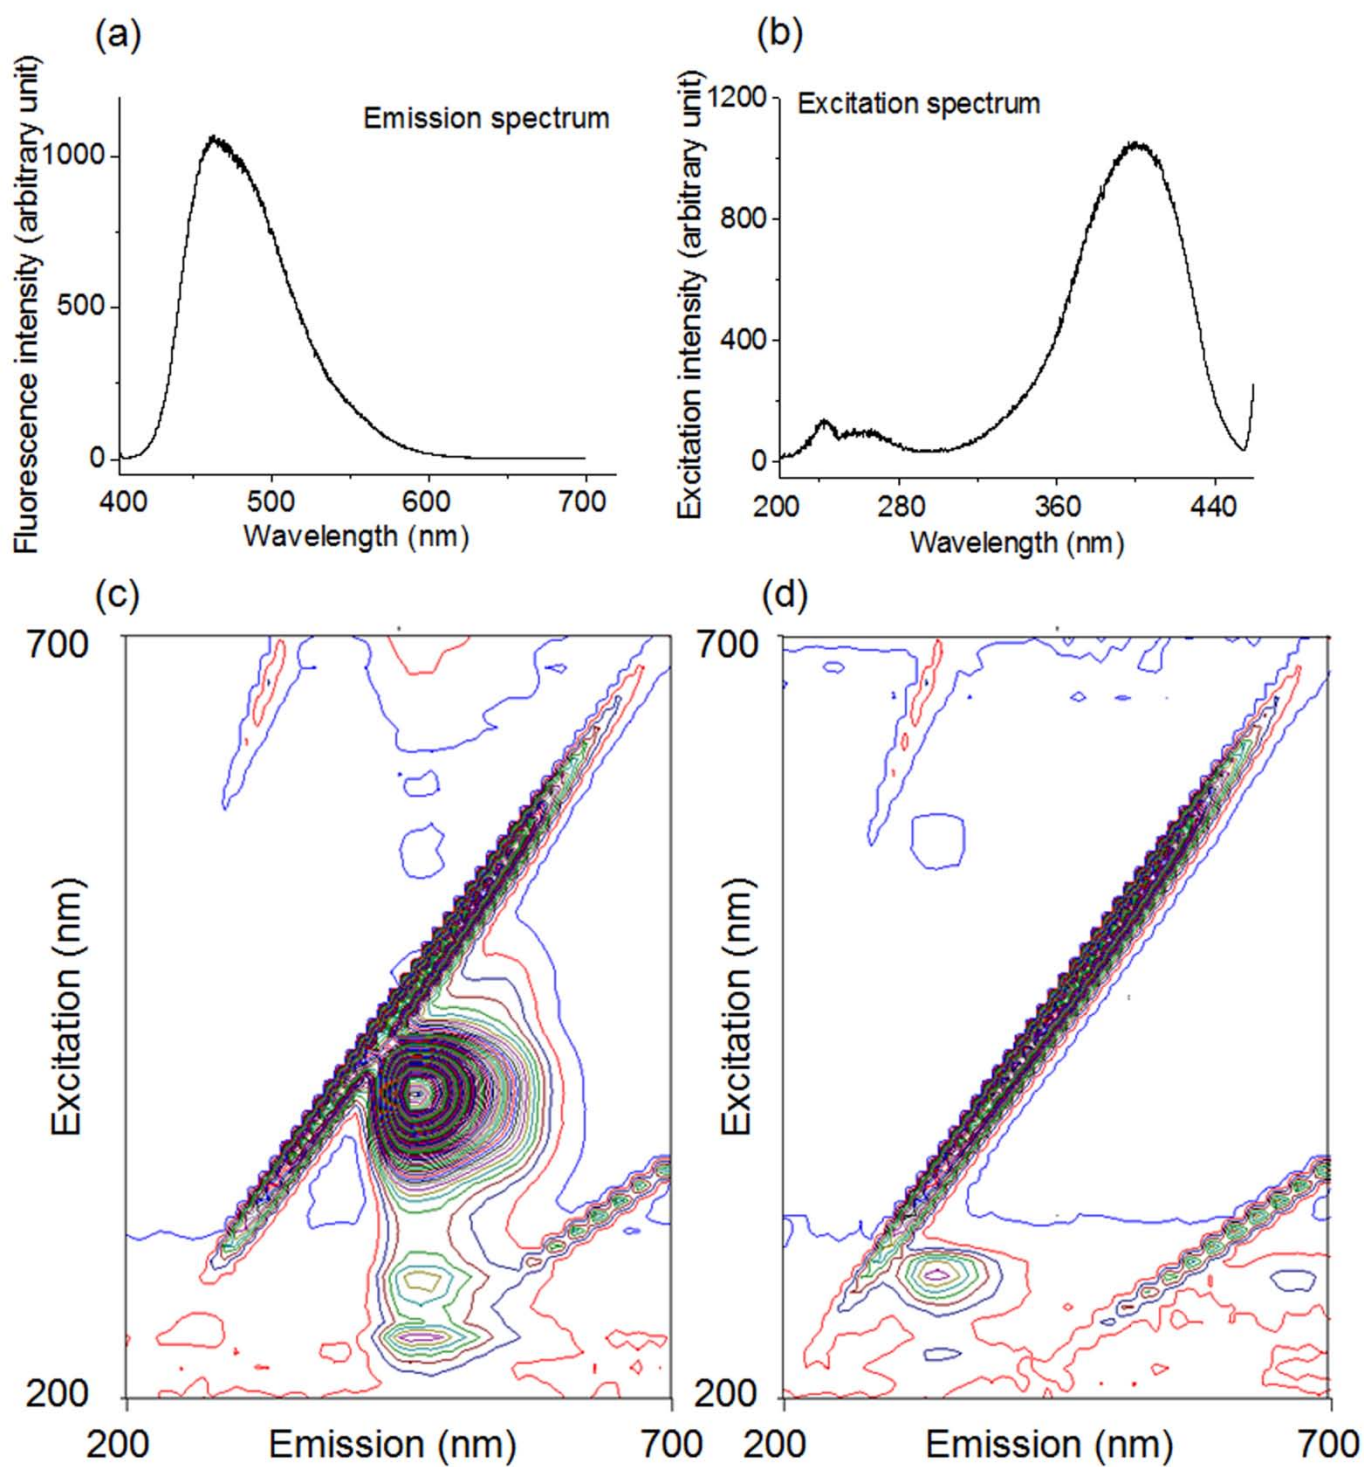

Fig. S4 Qiang et. al

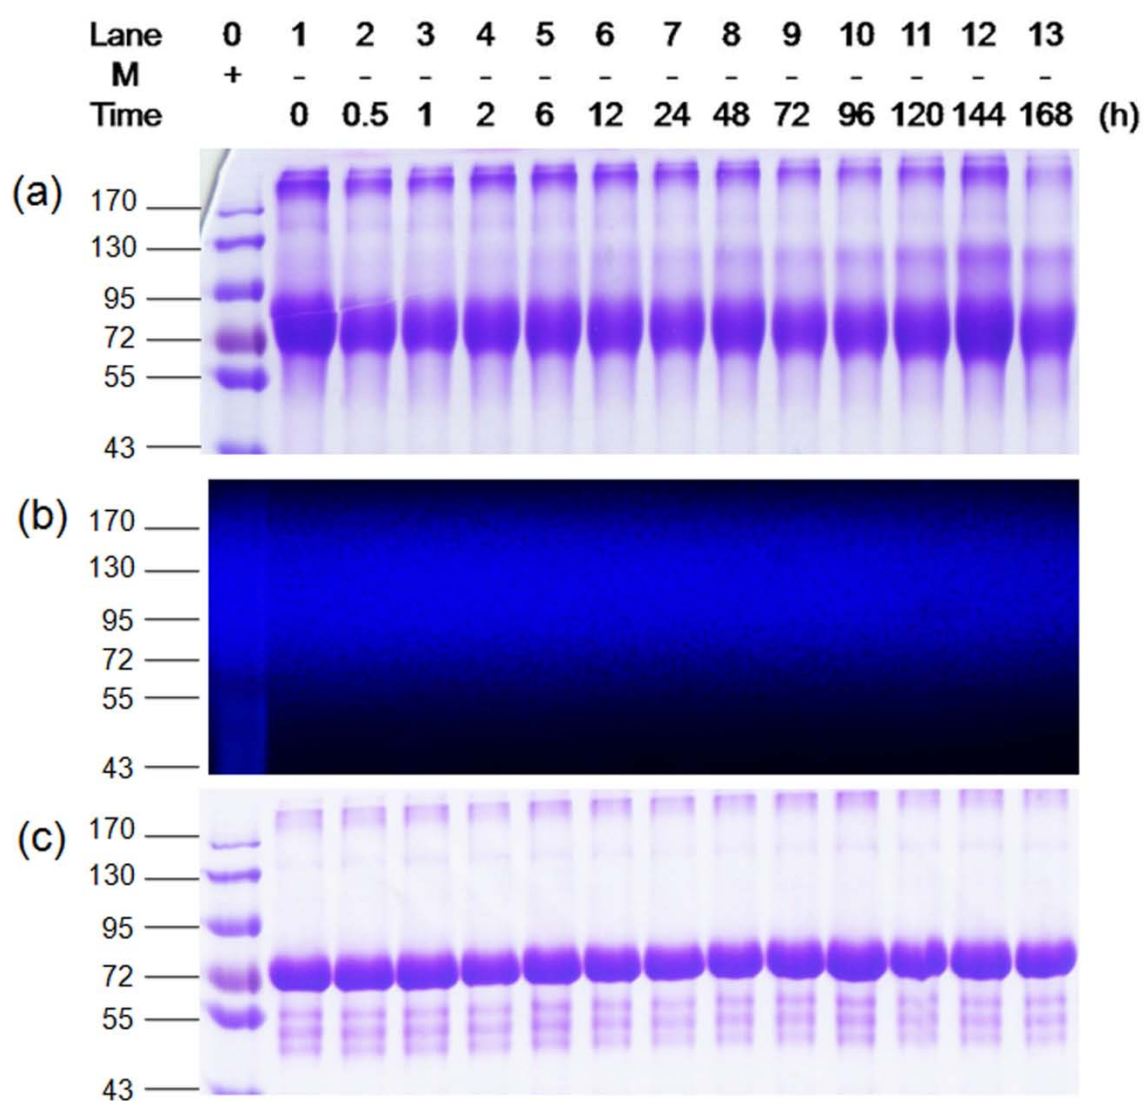

| Lane  | 1 | 2 | 3   | 4 | 5 | 6 | 7 | 8 | 9  | 10     |
|-------|---|---|-----|---|---|---|---|---|----|--------|
| AS    | - | + | +   | + | + | + | + | + | +  | +      |
| MDA   | - | + | +   | + | + | + | + | + | +  | +      |
| Time  | - | 0 | 0.5 | 1 | 2 | 4 | 6 | 8 | 12 | 24 (h) |
| Maker | + | - | -   | - | - | - | - | - | -  | -      |

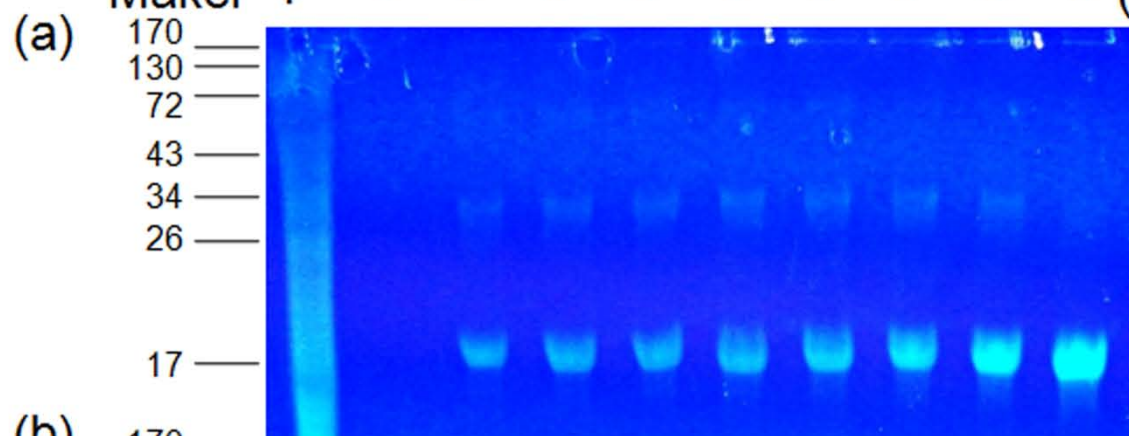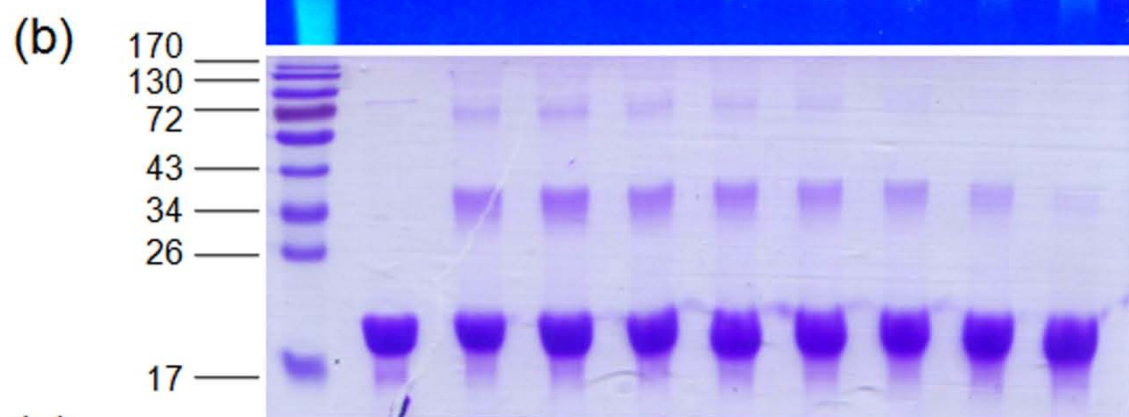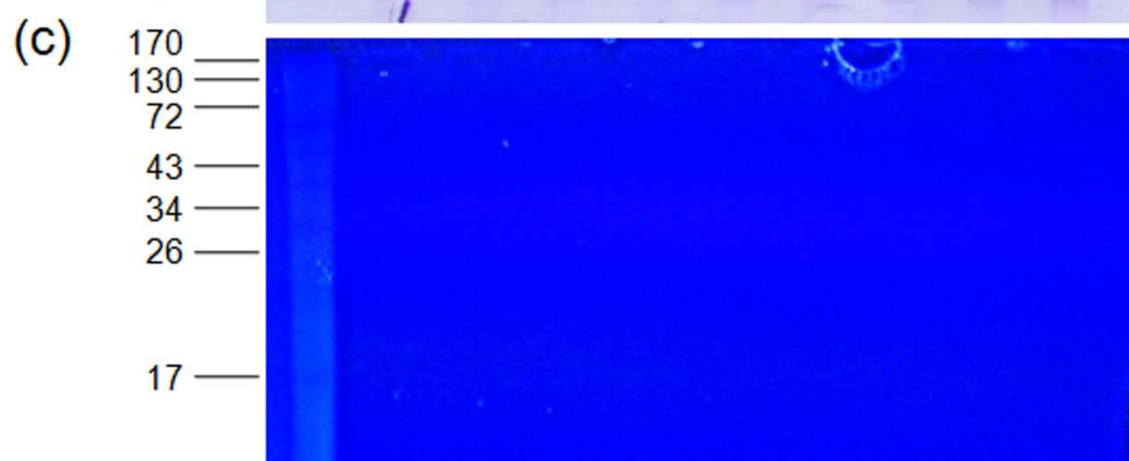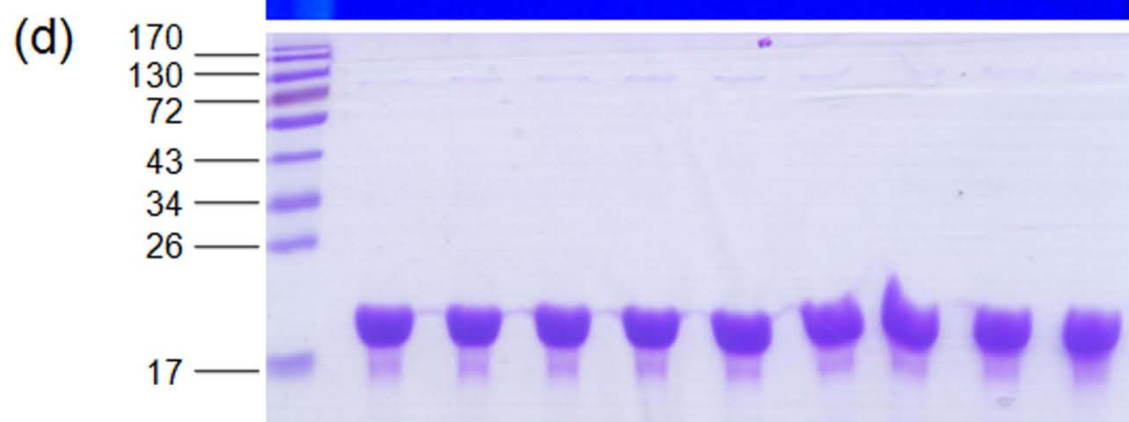

Fig. S6 Qiang et. al

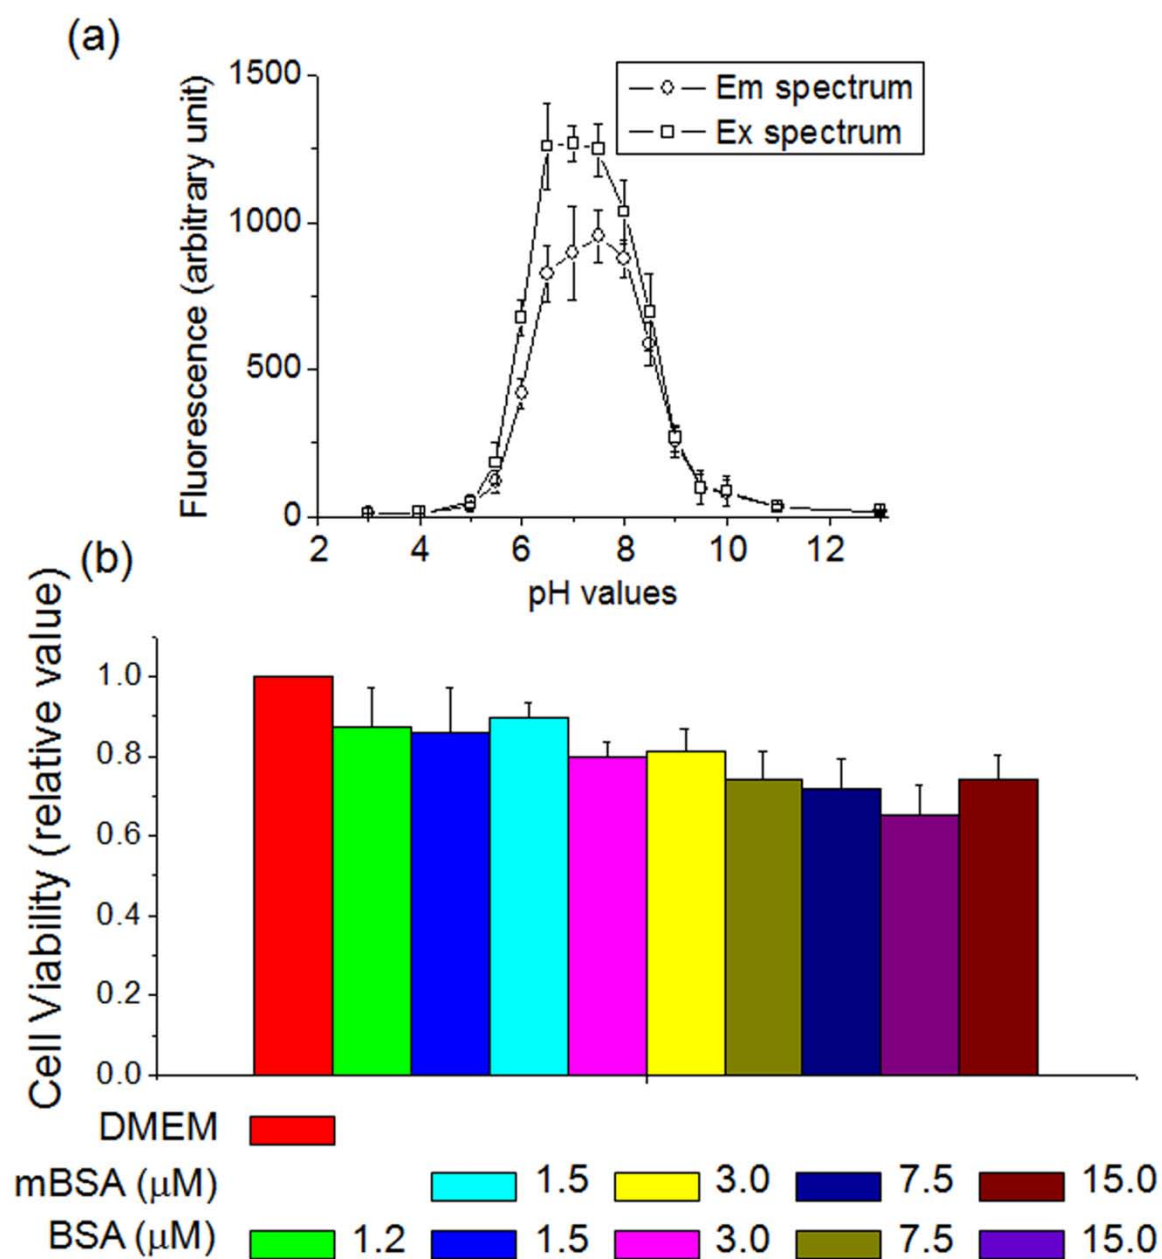

Fig. S7 Qiang et. al

mBSA+BF

mBSA

BSA+BF

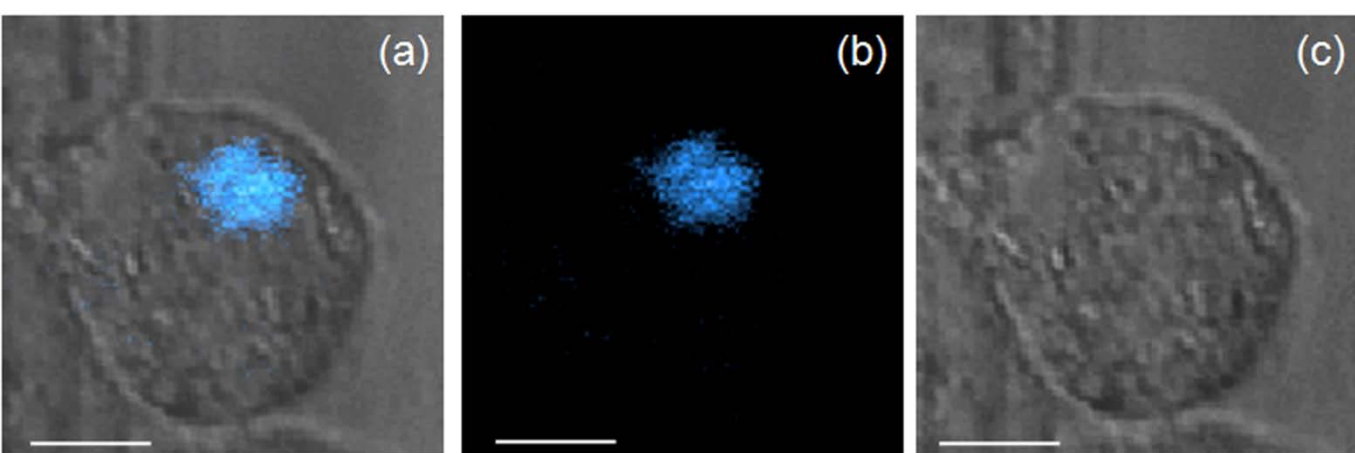

Bars = 10  $\mu$ m

Fig. S8. Qiang et al.

BSA+ BF+Dil

BSA+ BF

BSA

Dil

BF

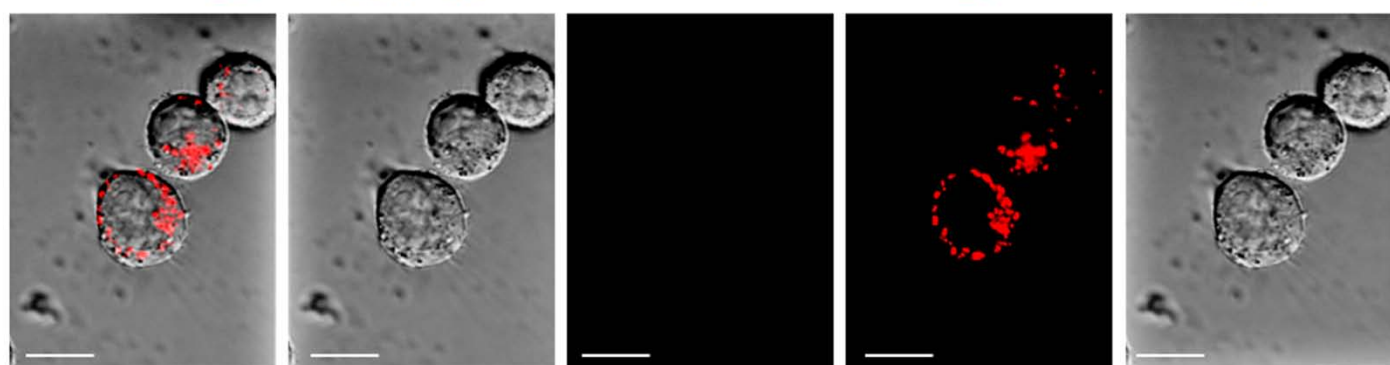

Bars = 10  $\mu$ m



Fig. S9 Qiang et. al

BSA+PI+F-actin

BSA+PI+F-actin

BSA+F-actin

BSA

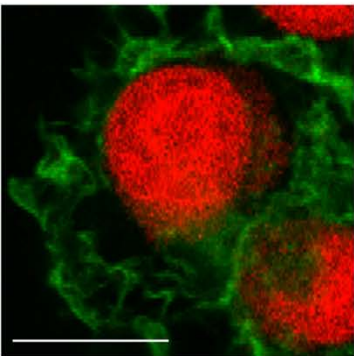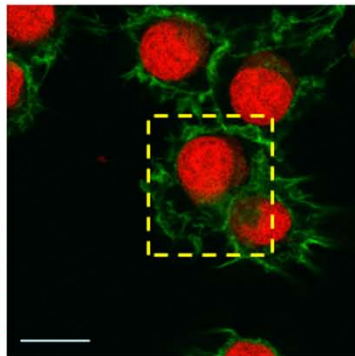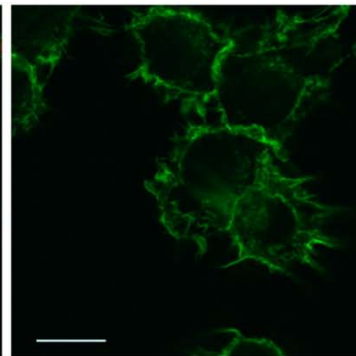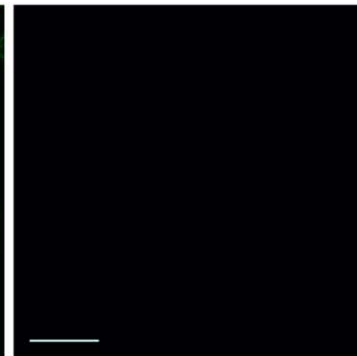

Bars =10  $\mu$ m
